# Supplementary material for: Sulfide Solid Electrolyte with Favorable Mechanical Property for All-Solid-State Lithium Battery
Source: PubMed Central journal article supplement — Sci Rep. 2013 Jul 23;3:2261. doi: 10.1038/srep02261 (PMC3719077; doi:10.1038/srep02261), 2013-07-23
Supplement: srep02261-s1.pdf [file srep02261-s1.pdf]

# **Sulfide Solid Electrolyte with Favorable Mechanical Property for All-Solid-State Lithium Battery**

Atsushi Sakuda<sup>1,2</sup>, Akitoshi Hayashi\*<sup>1</sup>, Masahiro Tatsumisago<sup>1</sup>

<sup>1</sup> Department of Applied Chemistry, Graduate School of Engineering, Osaka Prefecture University, 1-1, Gakuen-cho, Naka-ku, Sakai, Osaka, 599-8531, Japan

<sup>2</sup> Present address: Research Institute for Ubiquitous Energy Devices, National Institute of Advanced Industrial Science and Technology (AIST), Midorigaoka 1-8-31, Ikeda, Osaka, 563-8577, Japan

\*To whom correspondence should be addressed.

E-mail: hayashi@chem.osakafu-u.ac.jp

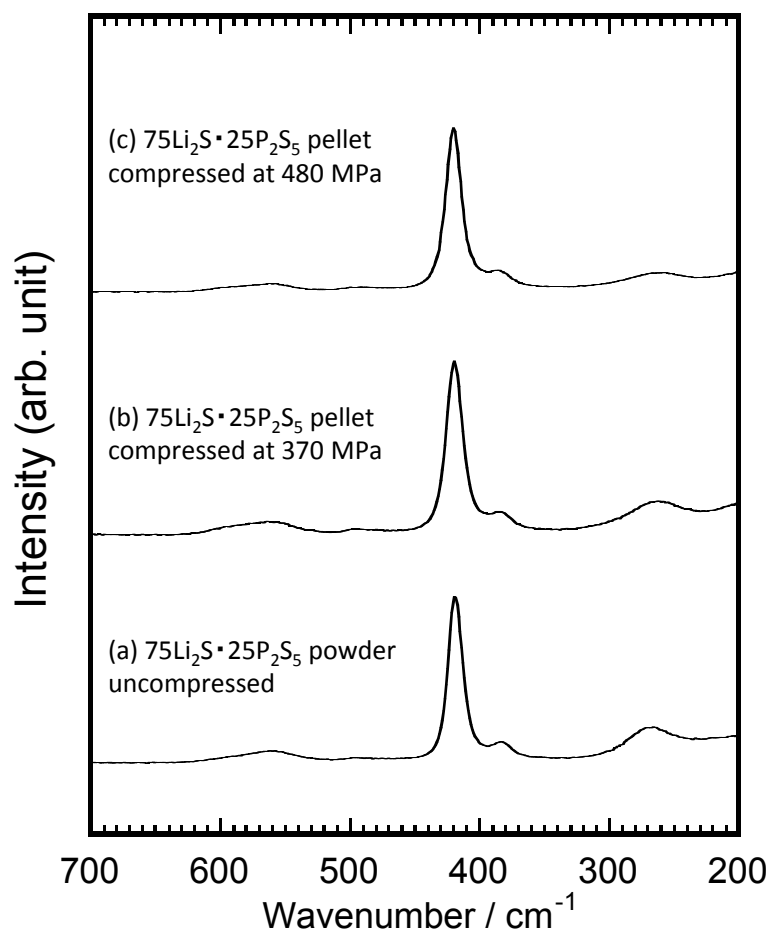

**Supplementary Figure S3.** Raman spectra of (a) uncompressed  $75\text{Li}_2\text{S} \cdot 25\text{P}_2\text{S}_5$  glass powder and  $75\text{Li}_2\text{S} \cdot 25\text{P}_2\text{S}_5$  glassy pellets compressed at (b) 370 MPa and (c) 480 MPa.

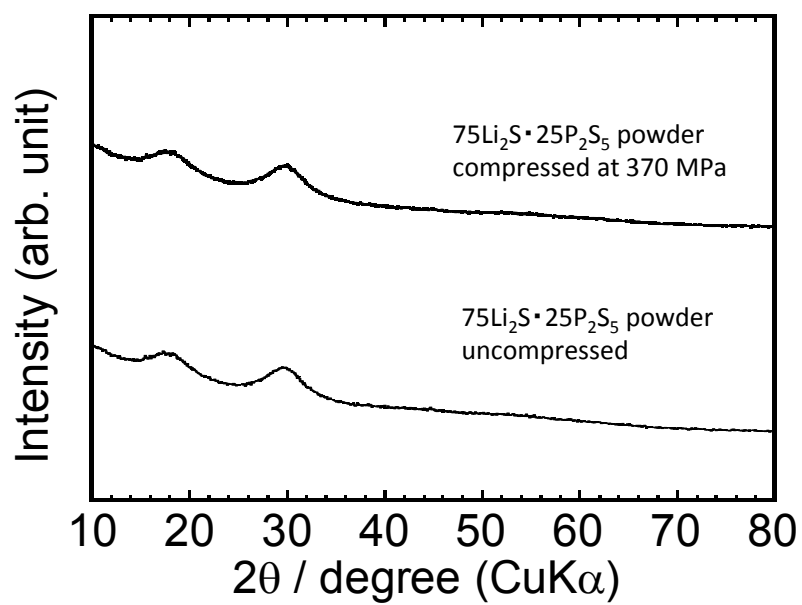

**Supplementary Figure S2.** XRD patterns of  $75\text{Li}_2\text{S}\cdot 25\text{P}_2\text{S}_5$  glass powders (a) before and (b) after compression at 370 MPa.

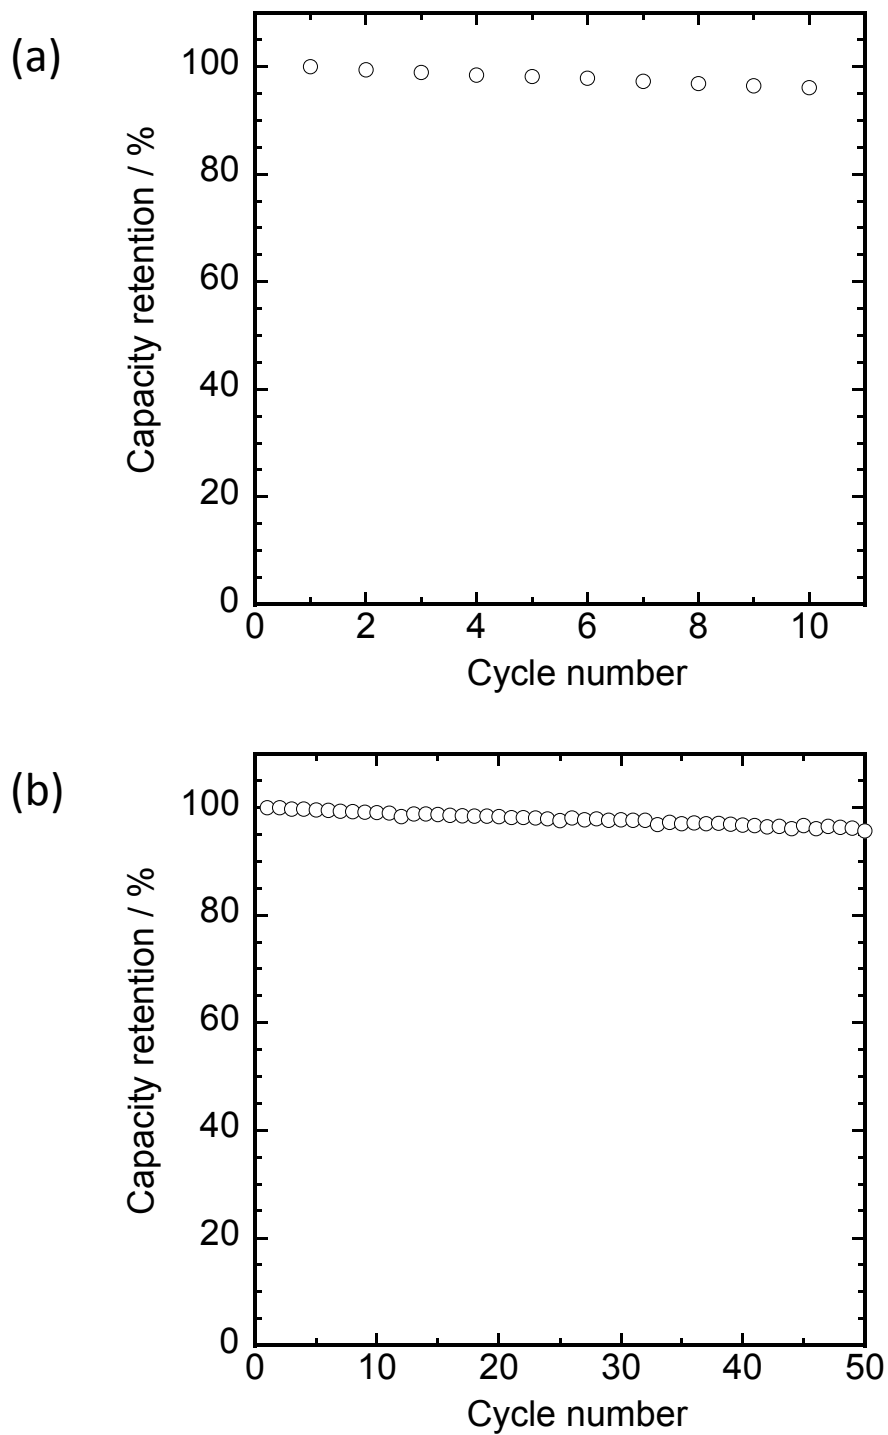

**Supplementary Figure S3.** Capacity retention of all-solid-state half cells using (a) SE-coated  $\text{LiCoO}_2$  and (b) SE-coated graphite. Indium foil (a) and lithium-indium alloy (b) were used as counter electrodes, and the  $80\text{Li}_2\text{S}\cdot 20\text{P}_2\text{S}_5$  glass was used as a solid electrolyte.
